# Supplementary material
Source: Springer Nature journal article supplement (https://www.springermedizin.de/resource/supplementary/12905_2012_312_MOESM1_ESM.pdf/9518416)
Supplement: MOESM1 [file 9518416]

38 records identified through database searching:

|              |           |
|--------------|-----------|
| PubMed       | 6         |
| CINAHL Plus  | 4         |
| PsycINFO     | 0         |
| ERIC         | 1         |
| EMBASE       | 9         |
| SCOPUS       | 8         |
| InforRMIT    | 10        |
| <b>TOTAL</b> | <b>38</b> |

No additional records identified through other sources:

HealthInfoNet:

Search term:

'menopause' → 12 links

'menopausal' → 0 links

'climacteric' → 15 links

→ 0 new references identified

19 records after duplicates removed

19 sources assessed for eligibility based on abstract

10 excluded as clearly not relevant, based on title/abstract  
N=94

9 full-text articles assessed for eligibility

7 articles excluded (described syndrome or prevalence in pre- or post-menopausal women (3); Aboriginal and menopause occurred but were not connected in the one article (3); an article on menopause was published in the Aboriginal Health Worker Journal

2 studies included in systematic review
